# Supplementary material for: Regional differences in clonal Japanese knotweed revealed by chemometrics-linked attenuated total reflection Fourier-transform infrared spectroscopy
Source: Springer Nature journal article supplement (doi:10.1186/s12870-021-03293-y), 2021-11-09
Supplement: MOESM1 [file 12870_2021_3293_MOESM1_ESM.pdf]

## Central Lancashire Online Knowledge (CLOK)

|          |                                                                                                                                                                                                                                                                                                                                                                              |
|----------|------------------------------------------------------------------------------------------------------------------------------------------------------------------------------------------------------------------------------------------------------------------------------------------------------------------------------------------------------------------------------|
| Title    | Regional differences in clonal Japanese knotweed revealed by chemometrics-linked attenuated total reflection Fourier-transform infrared spectroscopy                                                                                                                                                                                                                         |
| Type     | Article                                                                                                                                                                                                                                                                                                                                                                      |
| URL      | <a href="https://clock.uclan.ac.uk/id/eprint/39823/">https://clock.uclan.ac.uk/id/eprint/39823/</a>                                                                                                                                                                                                                                                                          |
| DOI      | <a href="https://doi.org/10.1186/s12870-021-03293-y">https://doi.org/10.1186/s12870-021-03293-y</a>                                                                                                                                                                                                                                                                          |
| Date     | 2021                                                                                                                                                                                                                                                                                                                                                                         |
| Citation | Holden, Claire A., Medeiros-De-morais, Camilo De Ielis ORCID icon ORCID: 0000-0003-2573-787X, Taylor, Jane E., Martin, Francis L., Beckett, Paul and McAinsh, Martin (2021) Regional differences in clonal Japanese knotweed revealed by chemometrics-linked attenuated total reflection Fourier-transform infrared spectroscopy. <i>BMC Plant Biology</i> , 21 (1). p. 522. |
| Creators | Holden, Claire A., Medeiros-De-morais, Camilo De Ielis, Taylor, Jane E., Martin, Francis L., Beckett, Paul and McAinsh, Martin                                                                                                                                                                                                                                               |

It is advisable to refer to the publisher's version if you intend to cite from the work.  
<https://doi.org/10.1186/s12870-021-03293-y>

For information about Research at UCLan please go to <http://www.uclan.ac.uk/research/>

All outputs in CLOK are protected by Intellectual Property Rights law, including Copyright law. Copyright, IPR and Moral Rights for the works on this site are retained by the individual authors and/or other copyright owners. Terms and conditions for use of this material are defined in the <http://clock.uclan.ac.uk/policies/>

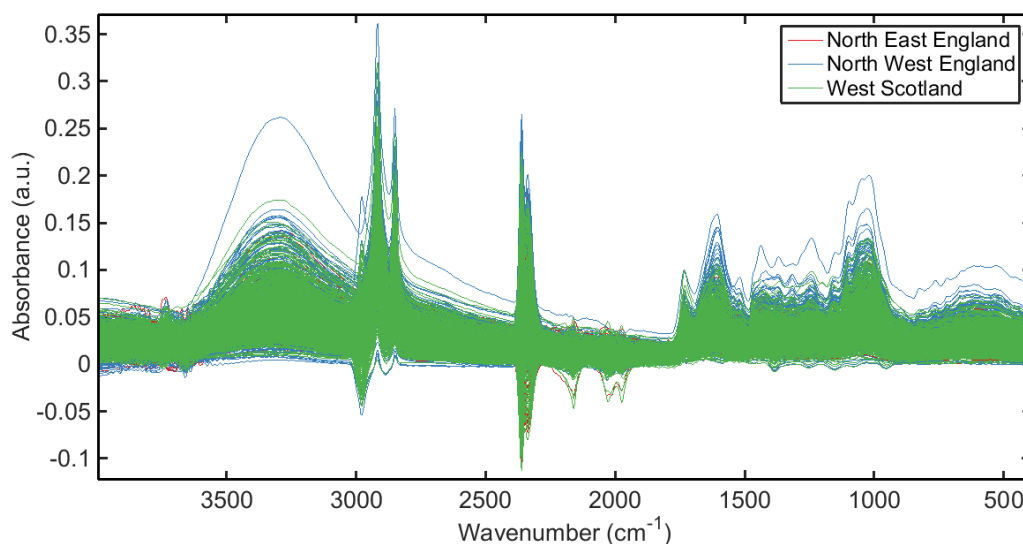

**Figure S1:** Raw IR data for different regions (North East England, North West England, West Scotland).

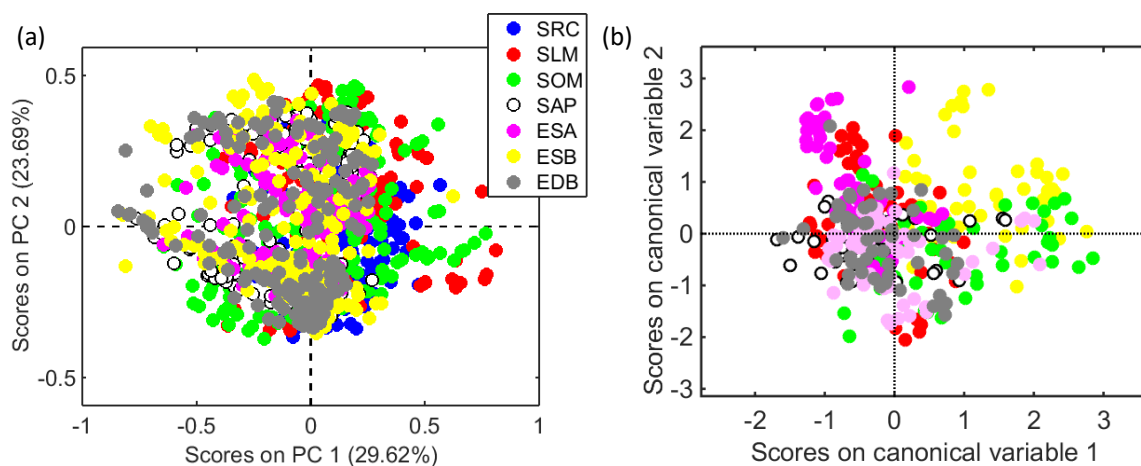

**Figure S2:** (a) PCA scores plot and (b) PCA-LDA canonical scores for the pre-processed spectral data in the fingerprint region for different sites where knotweed were collected (Scotland: SRC, SOM, SLM, SAP; North West England: ESA, ESB; North East England: EDB).

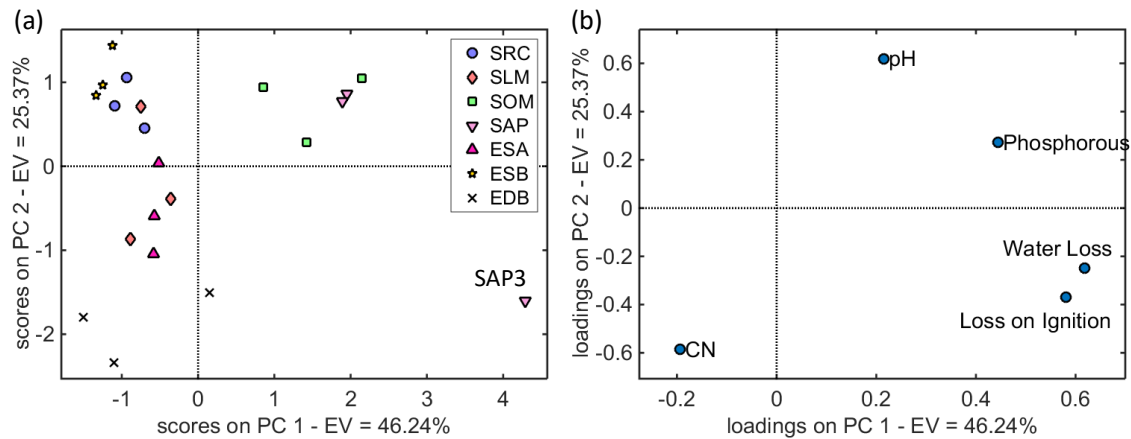

**Figure S3:** (a) PCA scores and (b) loadings for the soil data with extreme sample (SAP3).

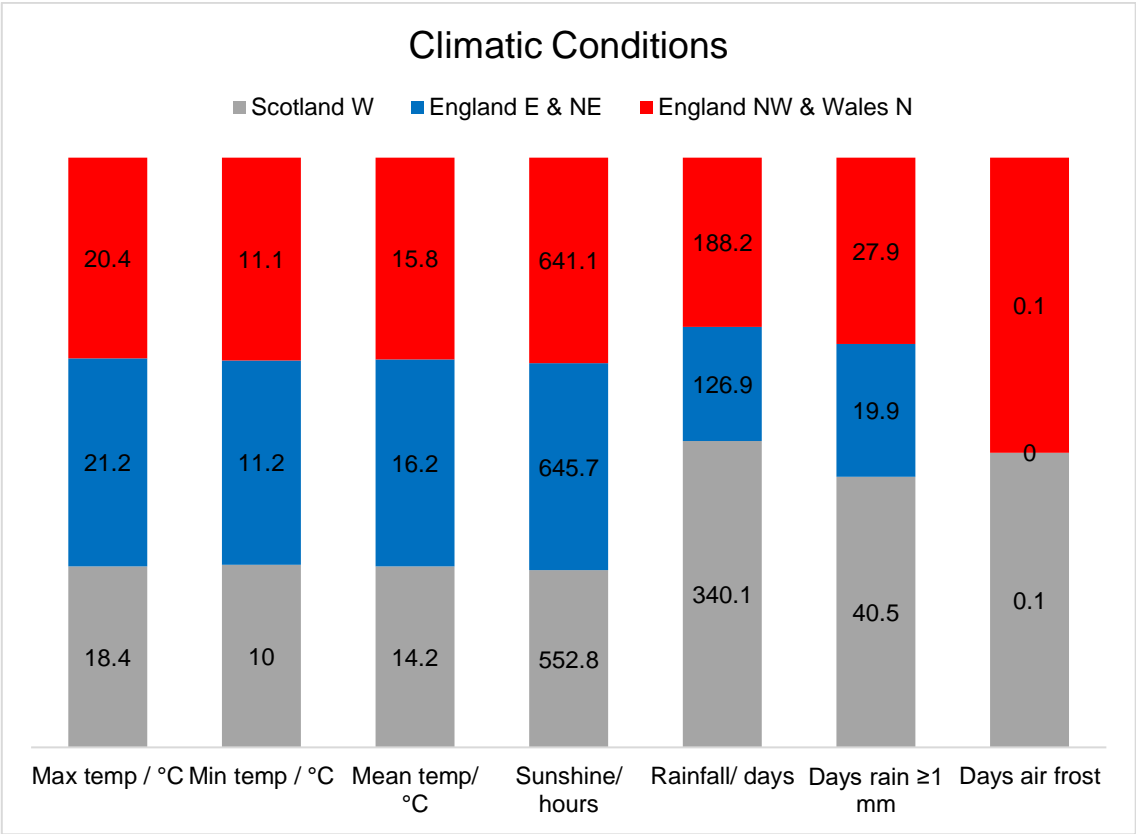

**Figure S4:** Climatic conditions for each region

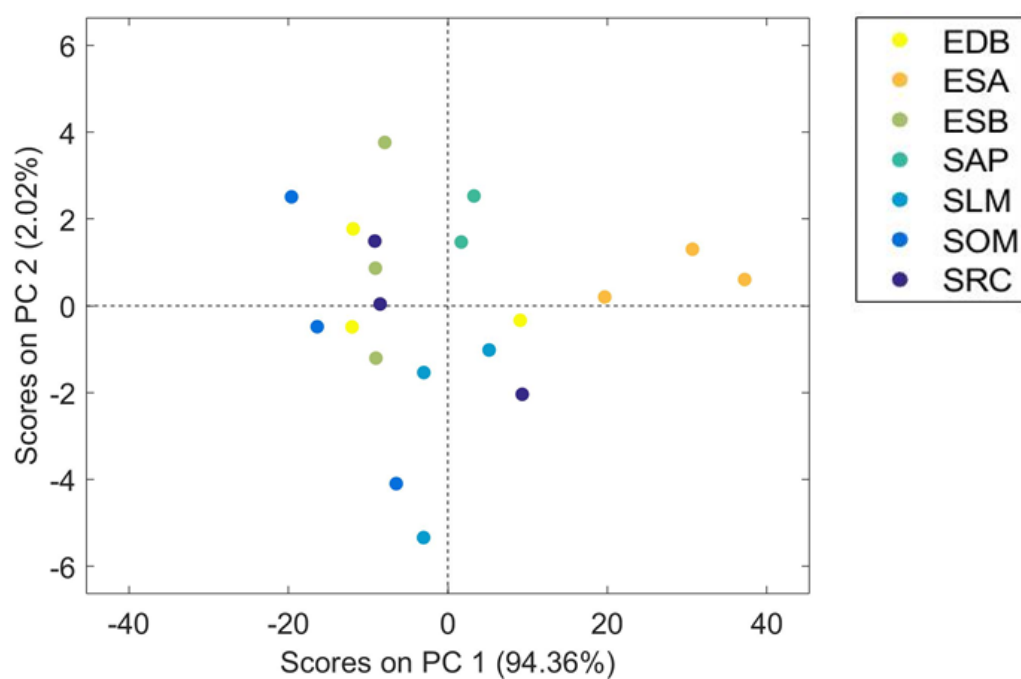

**Figure S5:** PCA scores for spectral and soil data combined (block-scaling applied before PCA).

*Regional differences in clonal Japanese knotweed revealed by chemometrics-linked Attenuated Total Reflection Fourier-Transform Infrared Spectroscopy - Supplementary Information*

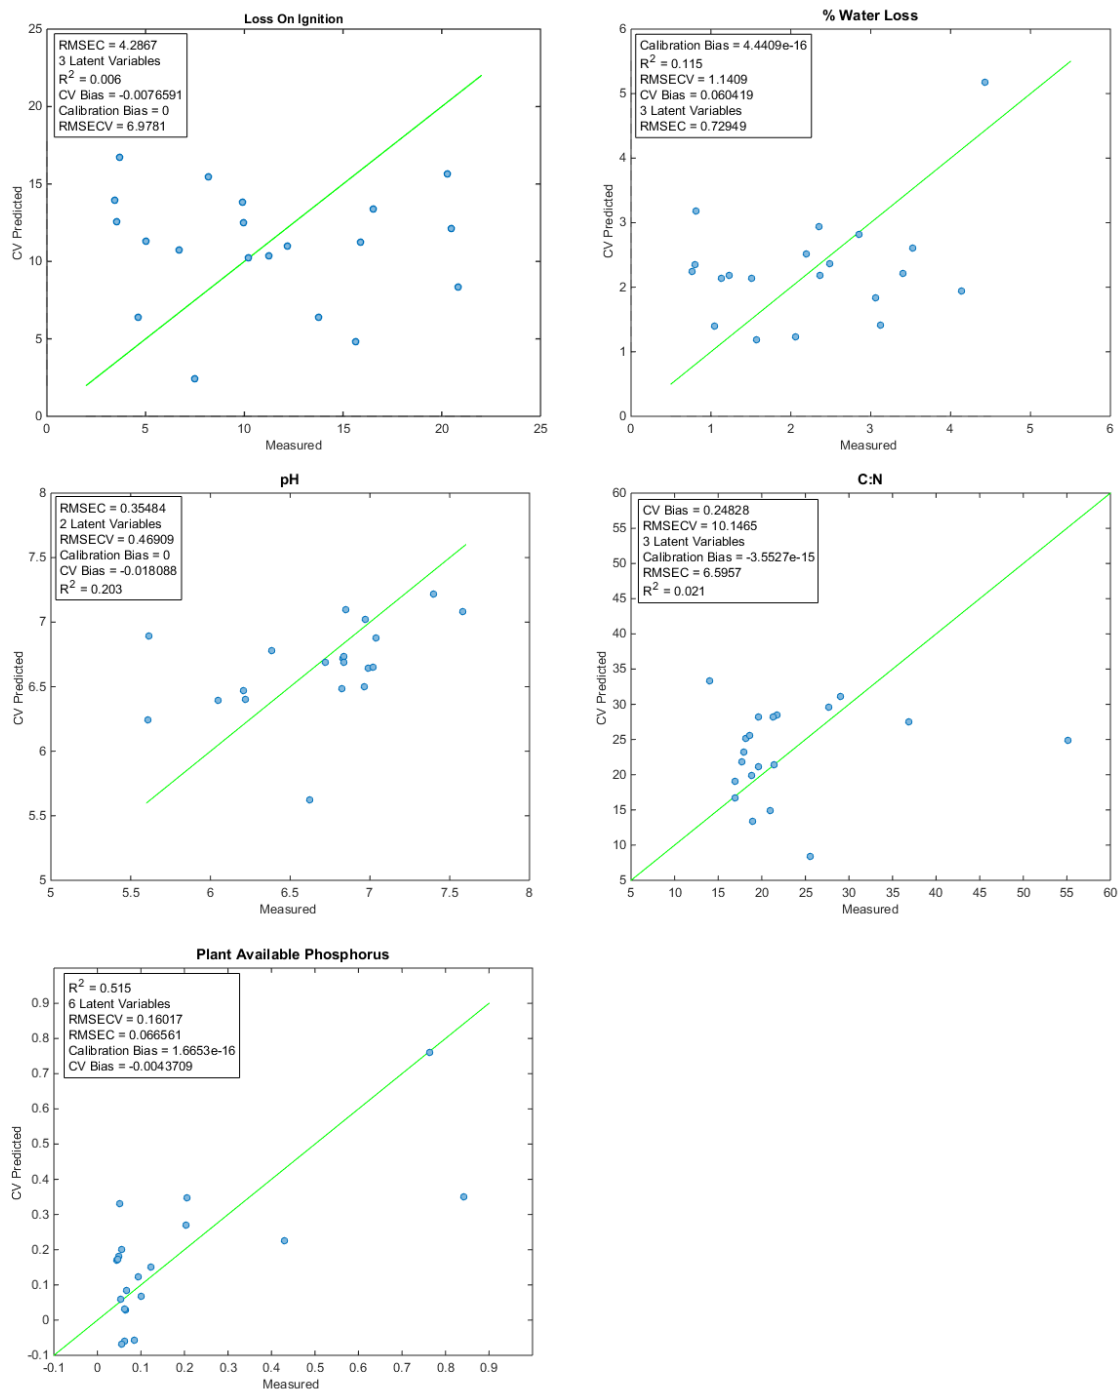

**Figure S6:** Measured versus predicted soil parameters based on the pre-processed spectral data using leave-one-out cross-validated partial least squares (PLS).

*Regional differences in clonal Japanese knotweed revealed by chemometrics-linked Attenuated Total Reflection Fourier-Transform Infrared Spectroscopy - Supplementary Information*

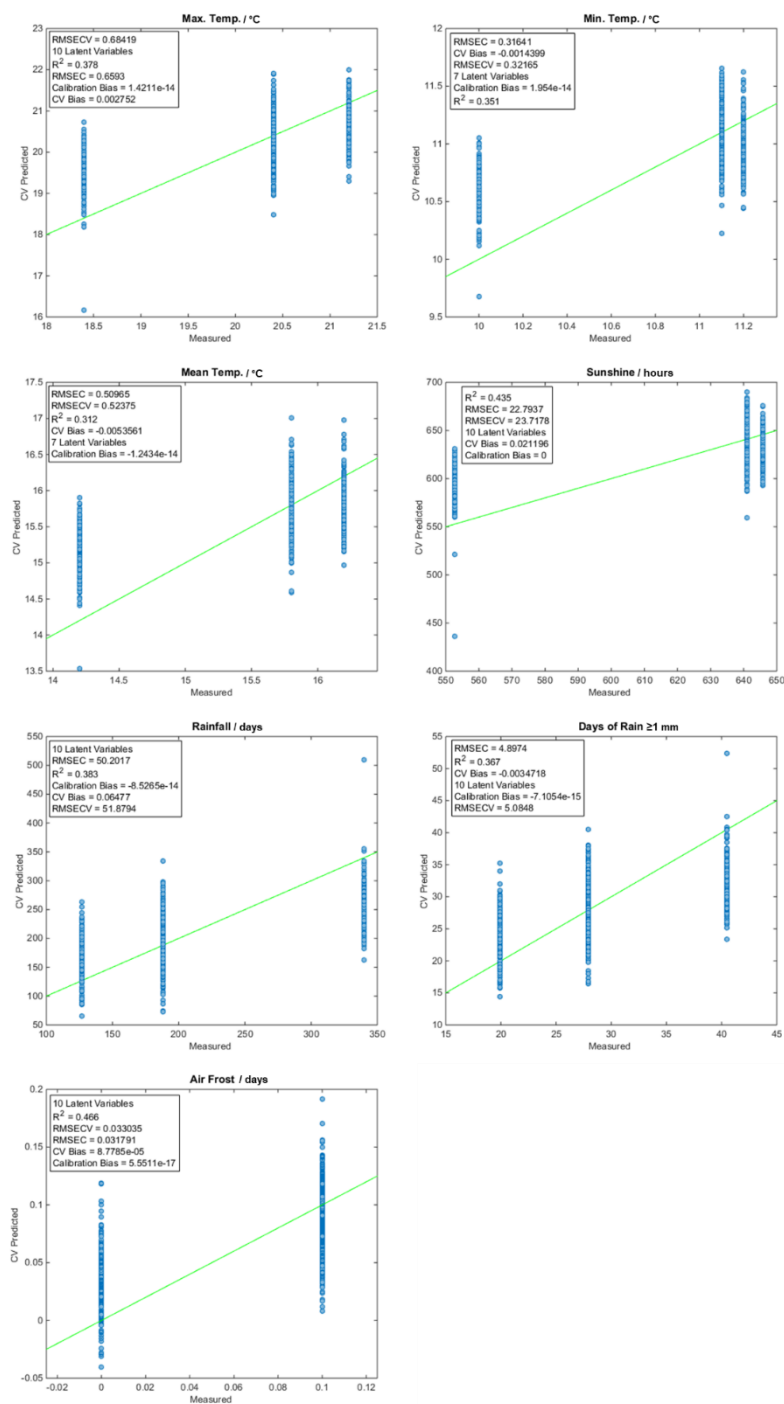

**Figure S7:** Measured versus predicted meteorological parameters based on the pre-processed spectral data using leave-one-out cross-validated partial least squares (PLS).

**Table S1:** Site Descriptions. Images taken by Claire Holden.

| Stand      | Description                                                                                                    | Soil Type     | Google Map Co-ordinates | Photo                                                                                |
|------------|----------------------------------------------------------------------------------------------------------------|---------------|-------------------------|--------------------------------------------------------------------------------------|
| <b>SAP</b> | Between a public footpath and a railway line in an urban area, near a road. Dead the following year.           | Urban         | 55.8236264, -4.0916304  |    |
| <b>SRC</b> | In full sun on Eastern bank of River Clyde                                                                     | Mineral gleys | 55.8186110, -4.0944440  |   |
| <b>SLM</b> | Western bank of River Clyde. Noticeably smaller leaves than those of SRC but appeared in overall better health | Mineral gleys | 55.8026350, -4.0905780  |  |



*Regional differences in clonal Japanese knotweed revealed by chemometrics-linked Attenuated Total Reflection Fourier-Transform Infrared Spectroscopy - Supplementary Information*

|            |                                                                                                                                                                     |                                                             |                          |                                                                                      |
|------------|---------------------------------------------------------------------------------------------------------------------------------------------------------------------|-------------------------------------------------------------|--------------------------|--------------------------------------------------------------------------------------|
| <b>SOM</b> | Brownfield site, previously used for numerous purposes including a railway siding and an old mine, but now transformed into a public park. Dead the following year. | Urban                                                       | 55.8211260, -4.0554206   |    |
| <b>ESA</b> | Wooded area further removed from river and path than ESB                                                                                                            | Clay-to-sandy loam                                          | 53.9491670, -2.7550000   |   |
| <b>ESB</b> | Edge of River Wyre. Main stand in full sun, however accessible leaves collected from the shaded side. Dead the following year.                                      | Clay-to-sandy loam                                          | 53.94977780, -2.75541670 |  |
| <b>EDB</b> | Adjacent to a wooded stream on the edge of one of the repurposed old railway lines now part of the Broompark cycle path network.                                    | Slowly permeable seasonally wet acid loamy and clayey soils | 54.764993, -1.609166     |  |
